# Supplementary material for: The house spider genome reveals an ancient whole-genome duplication during arachnid evolution
Source: Springer Nature journal article supplement (doi:10.1186/s12915-017-0399-x), 2017-07-17

**Intragenomic comparisons:**

|                   | PtPt  | CsCs  | LpLp  |
|-------------------|-------|-------|-------|
| Singletons        | 6323  | 13073 | 4236  |
| Dispersed         | 14895 | 14531 | 14581 |
| Proximal          | 2235  | 1114  | 97    |
| Tandem            | 3730  | 1717  | 2070  |
| Segmental         | 20    | 30    | 186   |
| Total             | 27203 | 30465 | 21170 |
| N50 scaffolds(kb) | 4055  | 342   | 254   |

[ftp://ftp.hgsc.bcm.edu/15K-pilot/Bark\\_scorpion/](ftp://ftp.hgsc.bcm.edu/15K-pilot/Bark_scorpion/)  
[ftp://ftp.ncbi.nih.gov/genomes/Limulus\\_polyphemus/](ftp://ftp.ncbi.nih.gov/genomes/Limulus_polyphemus/)

4 genes

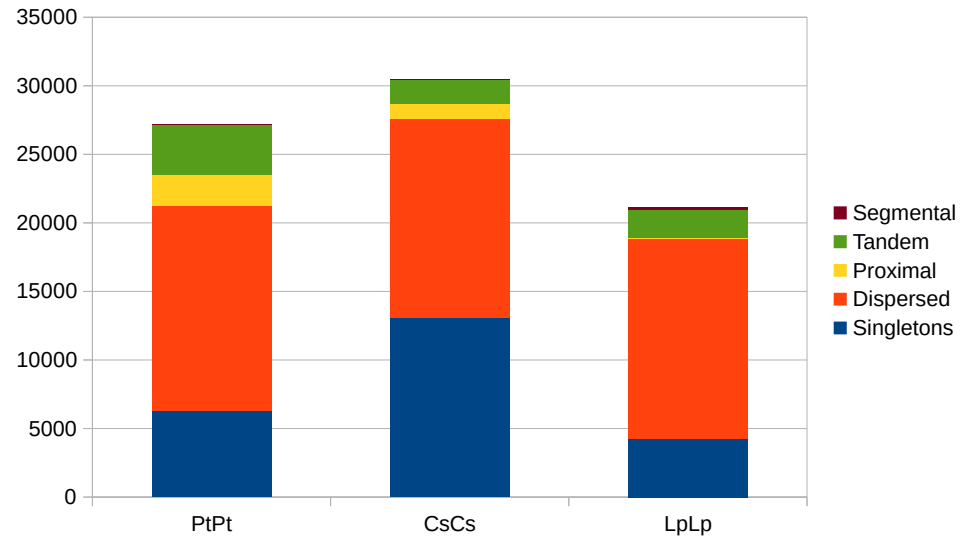

**Intergenomic comparisons:**

|            | LpCs  | LpPt  | CsPt  |
|------------|-------|-------|-------|
| Singletons | 17367 | 17139 | 23445 |
| Dispersed  | 34236 | 31214 | 34077 |
| Proximal   | 0     | 0     | 0     |
| Tandem     | 0     | 0     | 0     |
| Segmental  | 32    | 20    | 146   |
| Total      | 51635 | 48373 | 57668 |

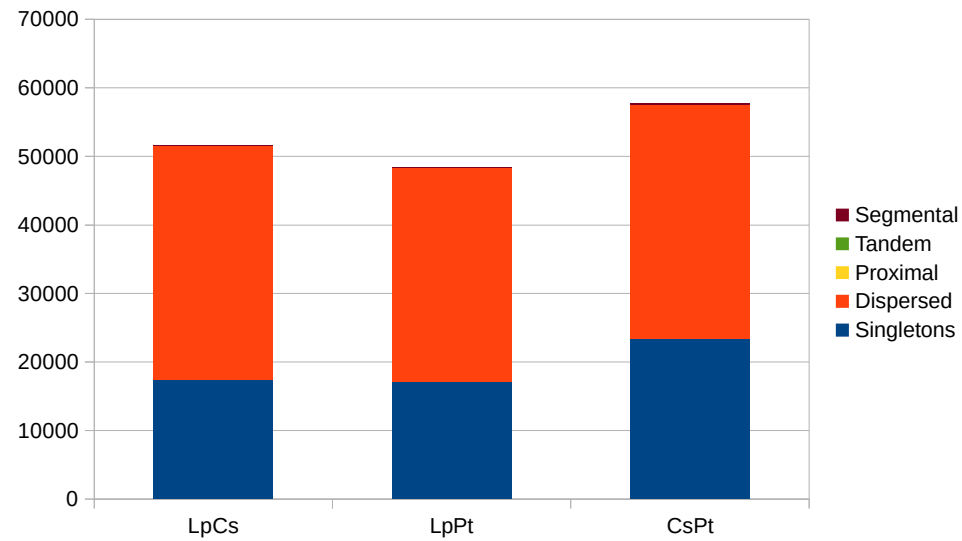

Supplement: MOESM3 [file 12915_2017_399_MOESM3_ESM.pdf]
