# Supplementary material for: The house spider genome reveals an ancient whole-genome duplication during arachnid evolution
Source: Springer Nature journal article supplement (doi:10.1186/s12915-017-0399-x), 2017-07-17

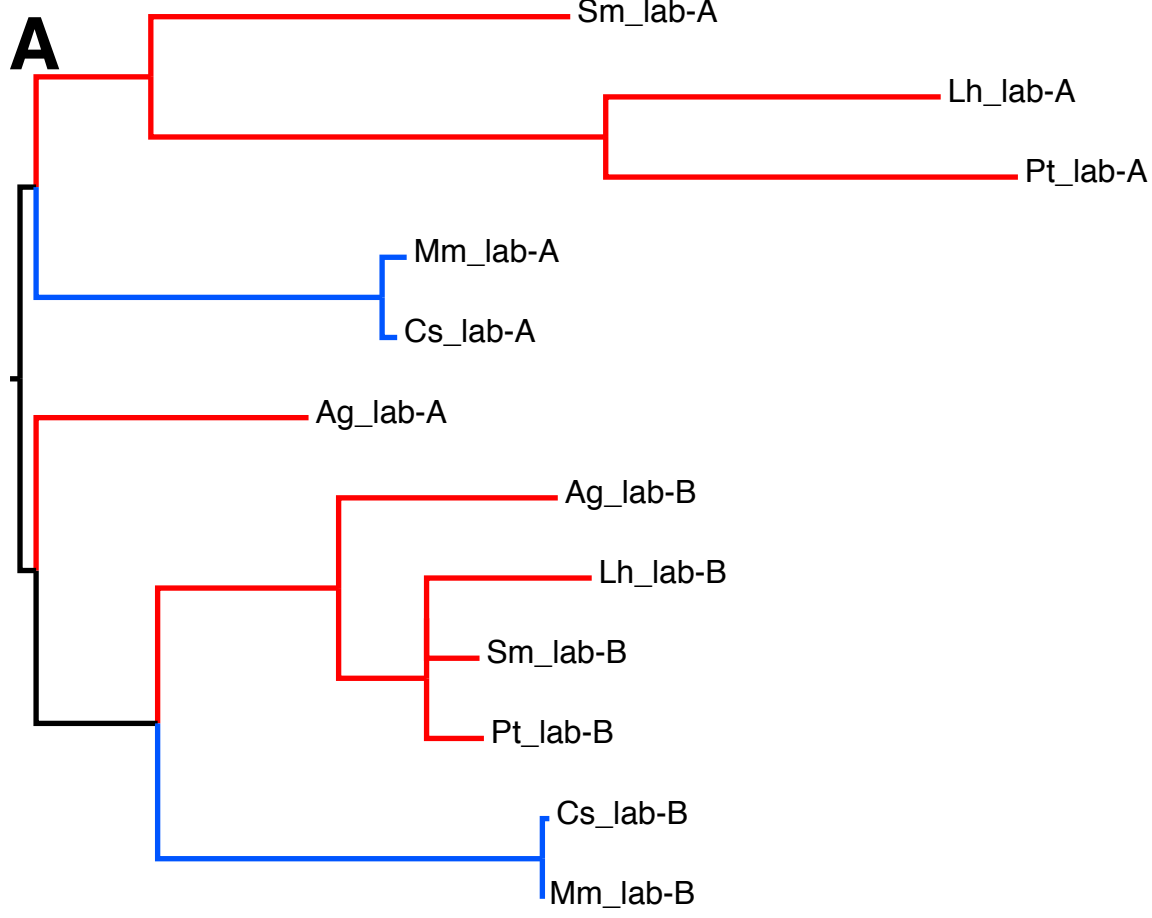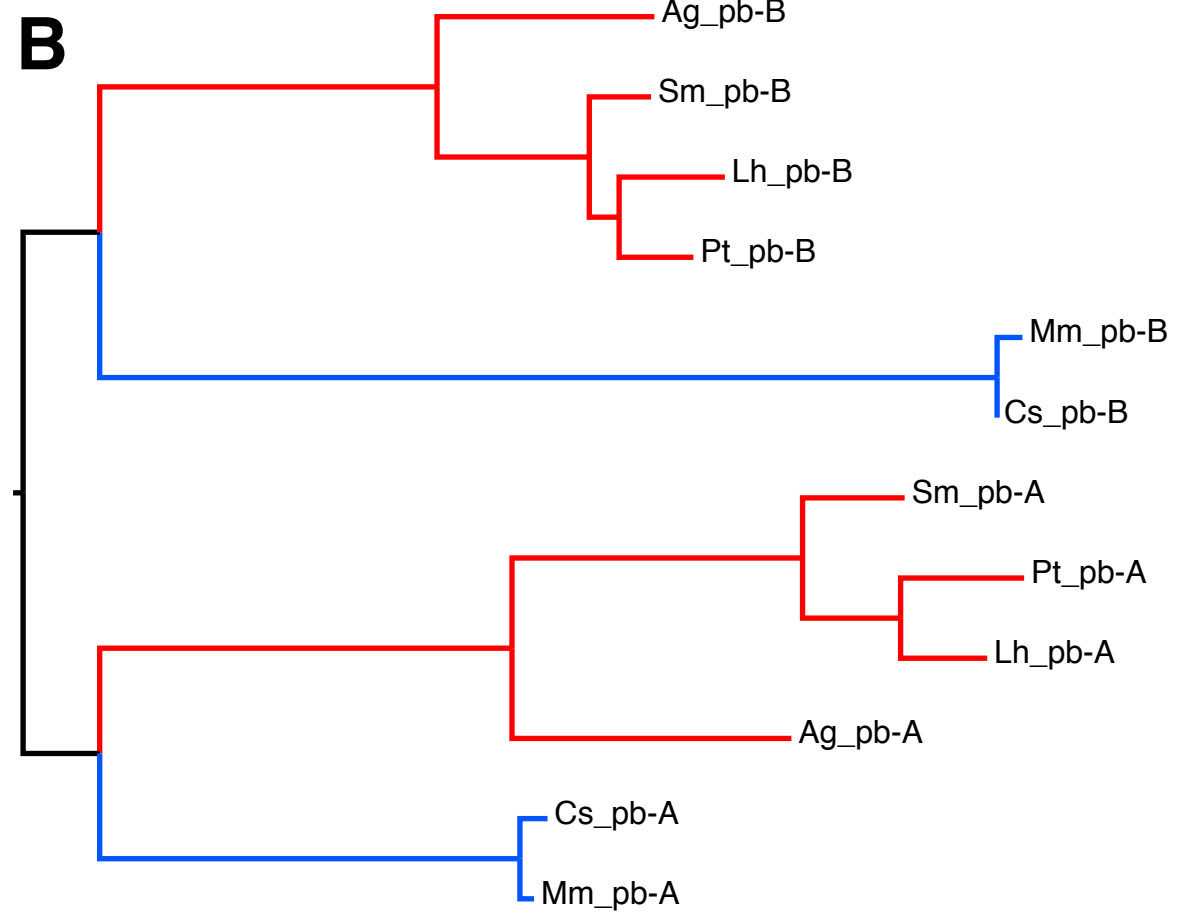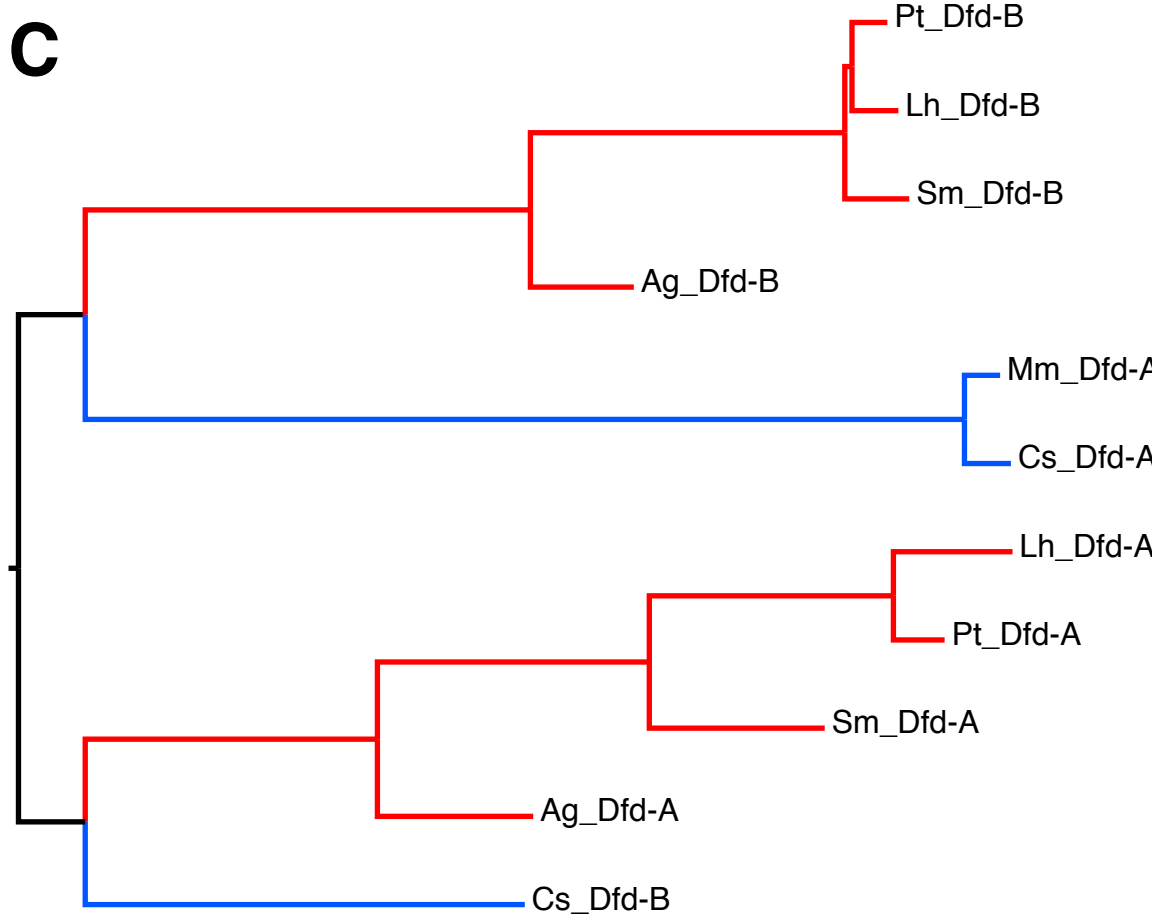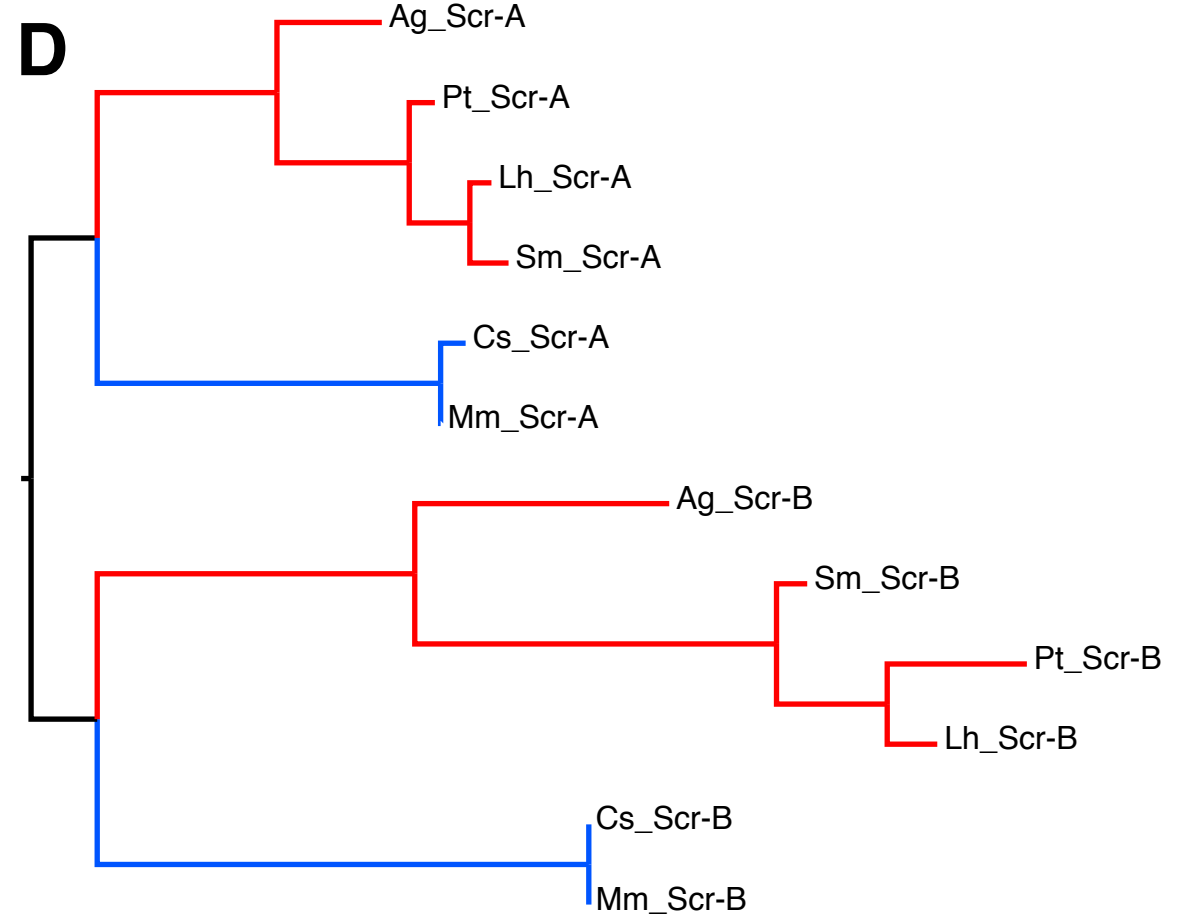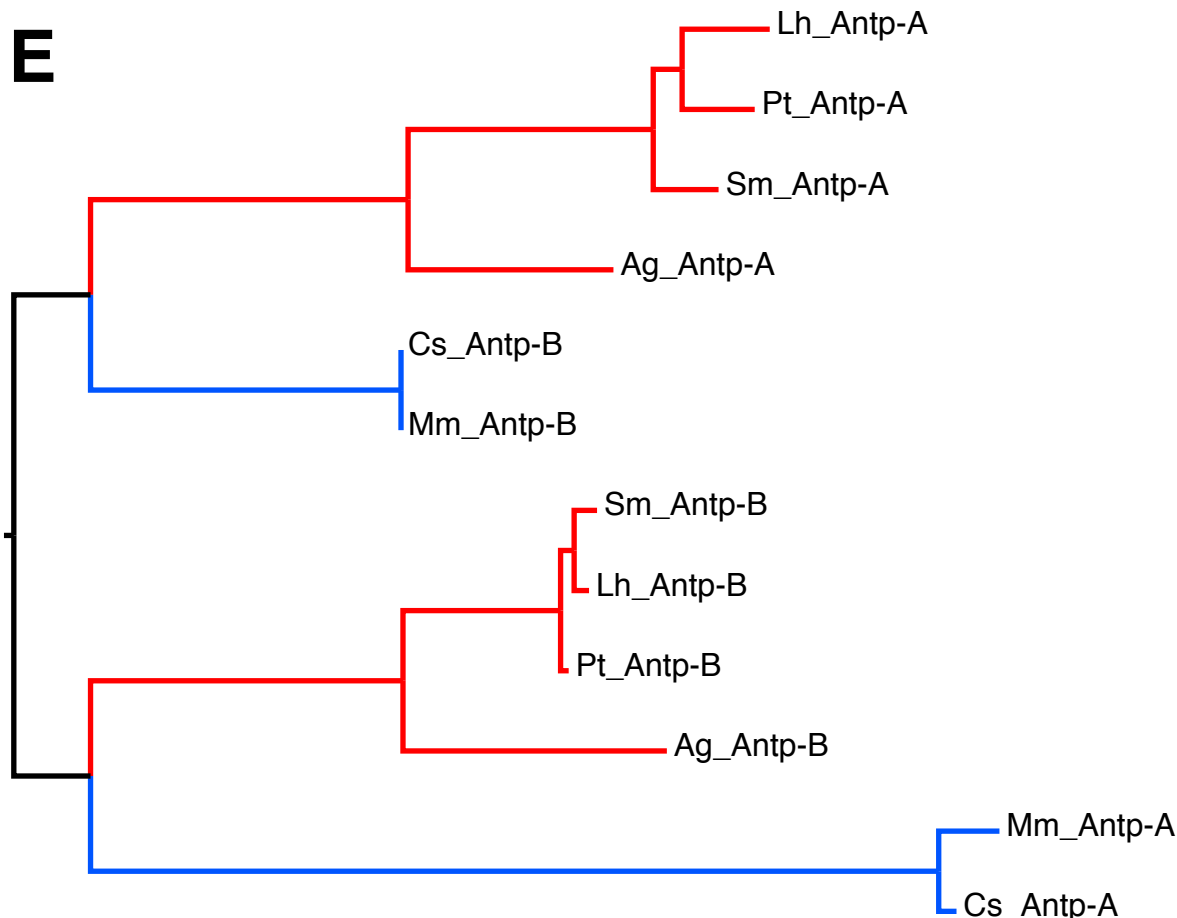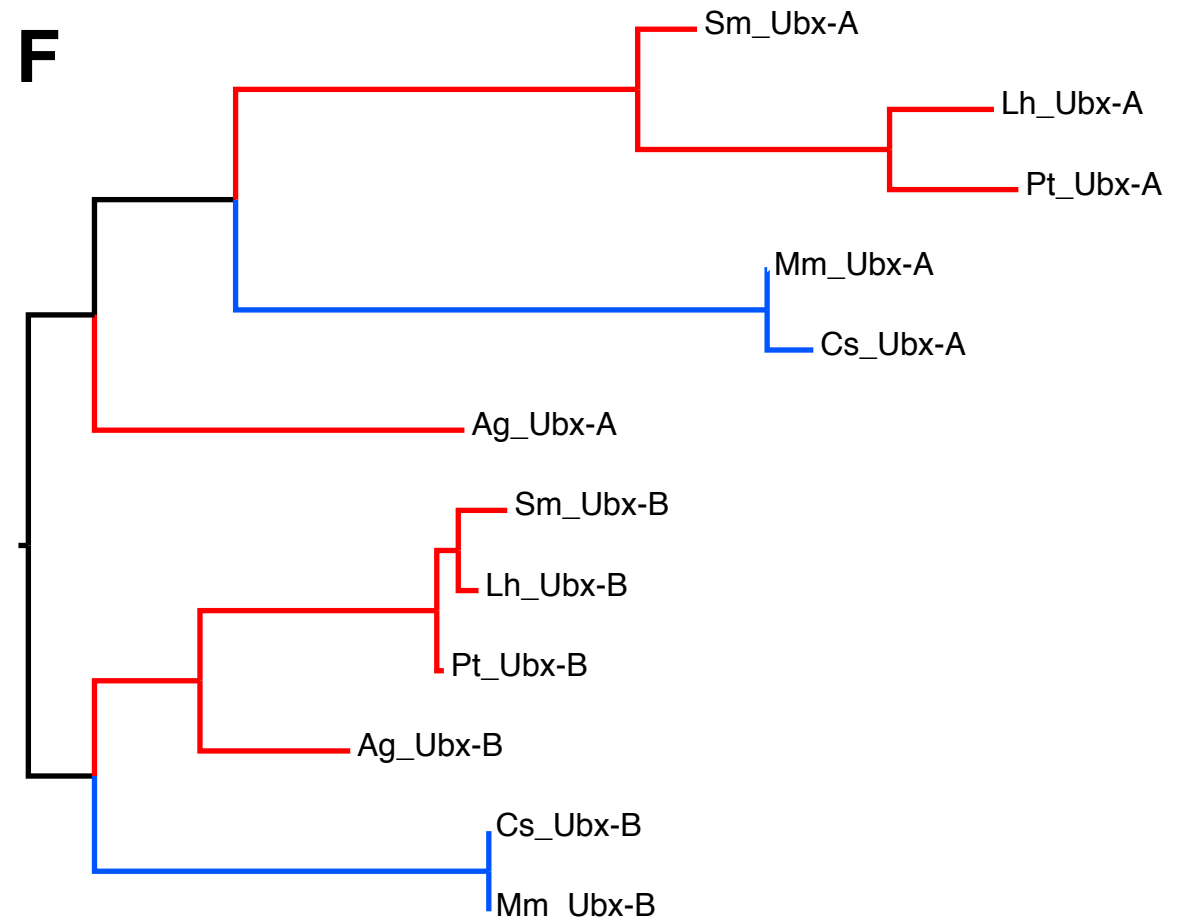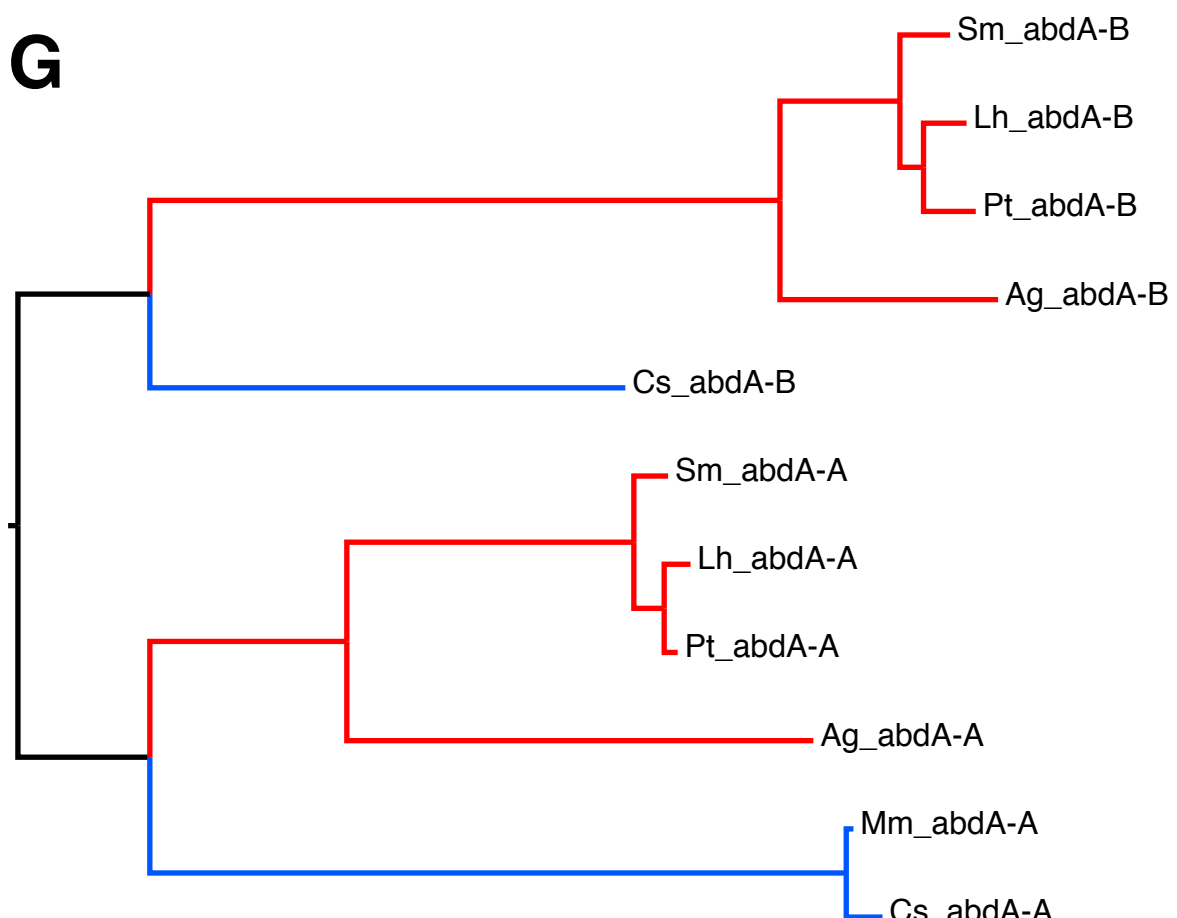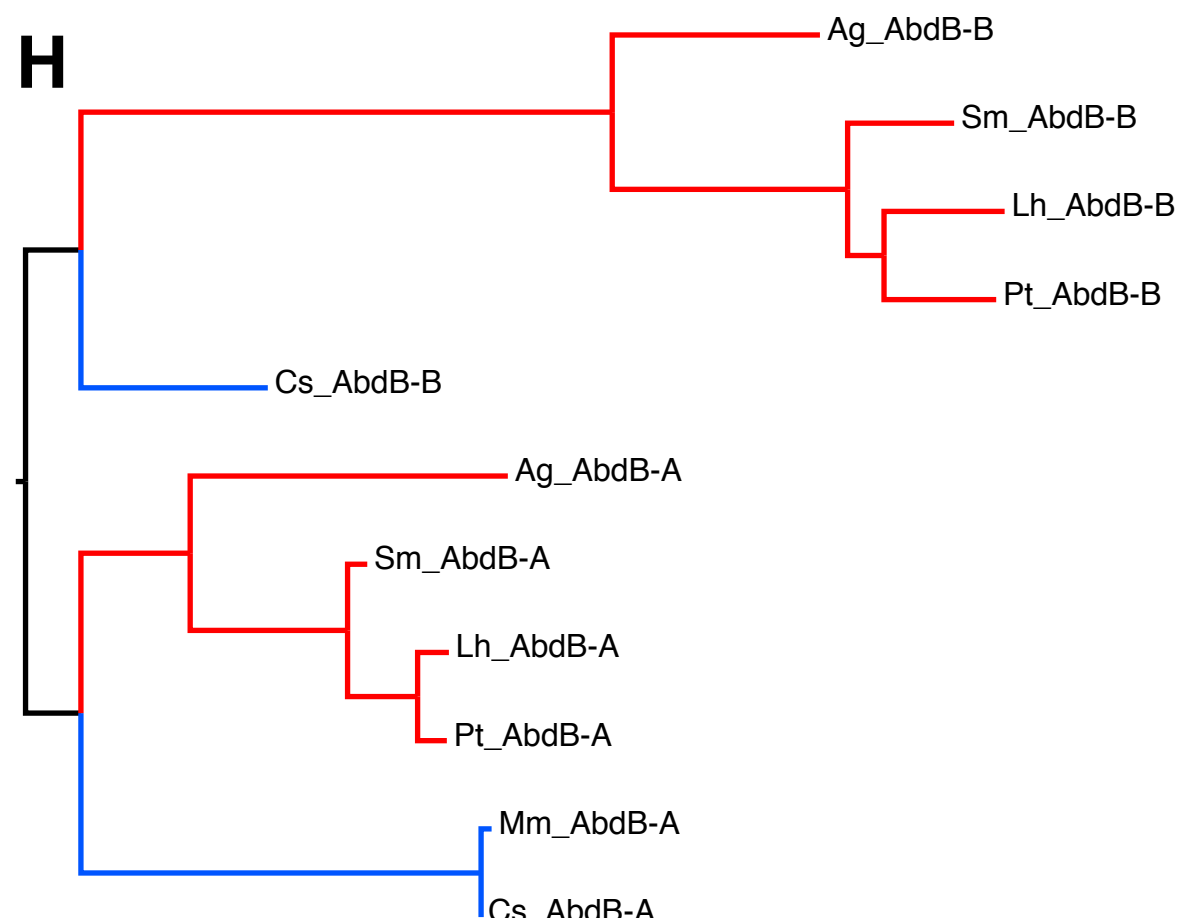

Supplement: MOESM7 [file 12915_2017_399_MOESM7_ESM.pdf]
